## Risk of death among teachers in England and Wales during the Covid19 pandemic

Sarah J Lewis<sup>1,2</sup>, Kyle Dack<sup>1,2</sup>, Caroline L Relton<sup>1,2</sup>, Marcus R Munafò<sup>1,3</sup> and George Davey Smith<sup>1,2</sup>

- 1.MRC- Integrative Epidemiology Unit, University of Bristol
2. School of Population Health Sciences, University of Bristol
3. School of Psychological Science, University of Bristol

Corresponding Author: Sarah J Lewis

### Abstract

**Objectives:** To use publicly available data on mortality in England and Wales to estimate the extent of occupation risk from Covid19 among teachers and others working in schools.

**Design:** Analysis of national death registration data from the Office for National Statistics.

**Setting:** England and Wales from March 20<sup>th</sup> – 28<sup>th</sup> December 2020, during the Covid-19 pandemic.

**Participants:** We compared mortality rates among teachers and other school workers to all working aged people and all professional occupations.

**Primary and Secondary outcomes:** Deaths with Covid19 was our primary outcome and death from all causes was our secondary outcome.

**Results:** We found that the absolute mortality rates for deaths with Covid19 were generally low amongst teachers ( $\leq 39$  per 100,000); they were also low relative to many other occupations. However, both male and female secondary school teachers had slightly higher risks of dying with Covid19 relative to all working aged people and greater risk compared to all professionals, primary school teachers did not have an elevated risk. The mortality risk for all causes was also higher in teachers compared to the working aged population. Excess deaths from all causes were higher among those aged over 65 who were working in schools compared to all over 65s who were currently working and compared to all professionals in this age group.

**Conclusion:** There is weak evidence that secondary school teachers (in particular females) may have a slightly higher risk of Covid19 mortality, but compared to many other occupations their risk is low. Further research is needed to determine why there is a high proportion of excess of deaths which were apparently not due to Covid19 among over 65 year-olds working in schools.

## Background

School closures have been implemented in many countries in an effort to slow the spread of the SARS-CoV-2 virus responsible for the Covid19 pandemic. This has affected hundreds of millions of children globally and has been contentious due to harms that have arisen to children as a result of school closures(1). Schools in England and Wales closed to most pupils (except a small number of children of critical workers and some vulnerable children) on the 20<sup>th</sup> March 2020 and did not reopen fully until September 2020; they closed again for the Christmas holidays (between 11<sup>th</sup> and 18<sup>th</sup> December) and have not yet fully reopened.

Whether or not teachers are at higher risk from Covid19 as a result of schools being open is central to decisions on school reopening, but until recently there have been no good data on this. Two as yet unpublished record linkage studies carried out in Scotland(2) and Finland (3) show that teachers have a greater risk of being diagnosed as a Covid19 case compared with the general population. There was a 25% higher risk in the Scottish study, and between 50% and 70% higher risk in the Finnish study. In addition, a study in Sweden found that teachers delivering in person teaching had a two-fold higher risk of Covid-19 infection compared to those who were teaching pupils remotely (4). However, studies from the UK (5) and from USA (6) have found low levels of transmission in schools. One reason for the discrepancy is that teachers are likely to be under greater surveillance, and therefore undergo more testing than those working in other occupations. In the Scottish study teachers were much more likely to be tested over the autumn term compared with the general population, and this is likely to explain at least some the elevated number of cases among teachers.

Analyses of more robust outcomes such as hospitalisation from Covid19 are less susceptible to detection bias and may be more reliable. The Scottish teachers study (2) found that 47 out of 11,101 teachers were hospitalised with Covid19 up to 26<sup>th</sup> November 2020, with an odds ratio (OR) of 0.98 (95% CI 0.67 to 1.45) for hospitalisation compared with controls (working-age members of the population who were neither teachers nor healthcare workers) matched on age, sex and general practice registration and adjusting for ethnicity, Scottish Index of Multiple Deprivation, comorbidity counts and sharing a household with a healthcare worker. Sweden has been an outlier in the Covid19 pandemic in that schools have remained open for children up to 16 years of age. A study by the Swedish Public Health Agency found that 20 out of 103,596 schoolteachers in Sweden received intensive care treatment up to the 30<sup>th</sup> June 2020, an age and sex matched analysis comparing teachers with those in other occupations (except health care workers) reported an OR of 0.43 (95% CI 0.28 to 0.68) among schoolteachers (7). In contrast a study carried out in Norway found higher rates of hospitalisation with Covid19 for preschool teachers and childcare workers, after adjustment for age, sex and country of birth (8).

The Office for National Statistics (ONS) routinely collect mortality data for those living in England and Wales. They have recently released data on deaths with Covid19 and all-cause mortality by occupation (9). We used this data to compared mortality risk among teachers and all working aged adults in England and Wales. We also compared mortality rates among teachers to all professionals, because there are large differences in mortality risk by occupation, largely driven by differences in socioeconomic circumstances (10).

## Methods

The ONS mortality statistics we used for this analysis are based on mandatory registration of all deaths in England and Wales. The ONS have so far released 3 datasets on mortality by

occupation with Covid19. The first dataset covered the period from 8<sup>th</sup> March to the 20<sup>th</sup> April which included the peak of wave 1 deaths. The second dataset covered the period between 8<sup>th</sup> March to the 25<sup>th</sup> May and the final dataset (the one we used for the analysis in this paper) covered the period from 8<sup>th</sup> March to the 28<sup>th</sup> December.

We used these data to determine whether the risk of death from Covid19 was higher among teachers and others working in the education sector compared to those working in other occupations. We compared the number of deaths with historical data on deaths for the same occupational group over 5 years (2015 to 2019) and compared death rates among teachers with death rates among all working aged individuals and all professionals in the population over the same period of the pandemic. We also looked at the ratio of mortality with Covid19 to a) all cause mortality and b) mortality from other causes among different occupational groups to determine whether teachers were outliers.

### Occupational exposure groups

Occupation is reported on the death certificate at the time of death registration by the informant and was coded according to the ONS standard occupational classification 2010 (10). Population counts for occupational groups were estimated from the Annual Population Survey (APS), conducted in 2019 (11). The APS is the largest ongoing household survey in the UK, based on interviews with members of randomly selected households.

The group 'teaching and educational professionals' as defined by ONS includes; higher education teaching professionals, further education teaching professionals, secondary education teaching professionals, primary and nursery education teaching professionals, special needs education teaching professionals, senior professionals of educational establishments, education advisers and school inspectors and teaching and other educational professionals not elsewhere defined.

The group 'teaching and educational professionals' does not include: teaching assistants, school secretaries, school midday assistants or educational support assistants, but these occupations are included in Tables 2 and 3 along with teachers working in schools.

### Outcome definition

ONS define deaths with Covid19 as those where Covid19 or suspected Covid19 was mentioned anywhere on the death certificate, including in combination with other health conditions. If a death certificate mentions Covid19, it will not always be the main cause of death but may be a contributory factor.

### **Statistical analysis**

We calculated the relative risk of death for education professionals compared to all working aged (20 to 64 year olds) people and compared to all professionals in England and Wales stratified by sex, for this we used published ONS data on total deaths and age adjusted mortality rates per 100,000 for each group. We derived the denominator (total population) for each group of interest as

$$\text{Population} = (\text{total deaths} \times 100000) / \text{mortality rate}.$$

The risk of death from Covid19 or all-causes was calculated as

*Risk = total deaths/population.* We compared risk of death between education professionals and the total working age population (and in a separate analysis to all professionals) to obtain relative risks. We calculated 95% confidence intervals and *p*-values using the formula;

$$CI = \exp(\ln(RR) \pm 1.96 \times \sqrt{(1/deaths + 1/control\ deaths - 1/population - 1/control\ population)})$$

$$P = \exp((-0.717 \times (RR/SE)) - (0.416 \times (RR/SE)^2))$$

The ONS data included deaths for 8 subgroups of educational professionals, of which 4 had a sufficient number of deaths ( $\geq 10$ ) to be included in our analysis: professionals working in nursery/primary, secondary, further, and higher education settings.

We estimated mortality rates for all other causes (other than Covid19) by calculating the difference between all cause mortality and mortality with Covid19 for each minor occupational group as defined by ONS (12).

We also produced scatterplots of 'all cause' versus 'with Covid19' mortality and 'all other causes' versus 'with Covid19' mortality by occupational group for men and women separately and calculated Pearson's correlation coefficient for these plots.

## Results

Between the 9<sup>th</sup> March 2020 and 28<sup>th</sup> December 2020 there were 68,757 deaths from all causes among the working age (20-64 years) population in England and Wales, 7,961 (12%) of these deaths involved Covid19, of which, 2,494 had occurred prior to the 20<sup>th</sup> April, 2,267 occurred between 20<sup>th</sup> April and the 25<sup>th</sup> May, and 3,200 occurred between the 25<sup>th</sup> May and the 28<sup>th</sup> December 2020.

There were 1,326 deaths from all causes among educational professionals during this period; 139 of those deaths were known to involve Covid19.

**Table 1** During the 10 months covered by the ONS data all cause and Covid19 mortality rates among educational professionals were lower than for all working aged adults and similar to those for all professionals.

Covid19 was involved in 1 in 8 male deaths and 1 in 9 female deaths among working aged people. Among education professionals, Covid19 was involved in approximately 1 in 8 deaths among males and 1 in 11 among females. Covid19 was involved in a higher proportion of deaths early on in the pandemic; data covering the 6 weeks of the first peak in the UK showed that Covid19 was involved in 1 in 4 deaths in males and 1 in 6 deaths in female education professionals during this time.

**Table 2** shows a breakdown the number of deaths by occupational group among those working in schools aged 20-64 years. The number of deaths in the individual groups are mostly small and it is difficult to draw conclusions from these as they are subject to random fluctuations. However, among female teachers there were fewer deaths than the 5-year average and among males teachers deaths were 3% higher. When deaths across all occupations working in schools were combined, we observed 15% more deaths (excess) compared with the 2015-2019 average for the same period among men and 5% more among women. For women this is less than the excess observed across all occupations and among all professionals. Deaths with Covid19 appeared to account for almost all the excess among men whereas among women there were twice as many deaths with Covid19 as there were excess deaths.

**Table 3** shows a breakdown of the number of deaths by occupational group among those working in schools aged 65 and older. This age group have much higher numbers of excess deaths compared with their 5 year average than the younger age group. Amongst all males in this age group there were 74% more deaths compared with the 5 year average, amongst

females there was a 37% increase compared with the 5-year average. However, only 33% of excess deaths in males and 37% in females working in the schools were thought to involve Covid19. The group of all professionals and of all occupations had fewer excess deaths as a proportion of their 5-year average but a higher proportion of the deaths involved Covid19 compared with those working in schools.

We did not have the denominators (total number working in each occupational group) for the figures presented in Tables 2 and 3, so we were unable to work out the uncertainty in these estimates, and this will be very large in some of the smaller occupational groups.

**Table 4** compared to the total working aged population there was strong evidence that the risk of dying with Covid19 was lower among all education professionals (RR<sub>Males</sub> 0.59, 95%CI 0.46 to 0.75, RR<sub>females</sub> 0.58, 95%CI 0.46 to 0.73). There was also some evidence of a lower risk of death with Covid19 among female primary and nursery education professionals (RR 0.60, 95%CI 0.38 to 0.93). However, for both male and female secondary school teachers the relative risk estimate shows a 25% higher risk of death from Covid19, although there was a great deal of uncertainty around these estimates (RR<sub>Males</sub> 1.25, 95%CI 0.87 to 1.80, RR<sub>females</sub> 1.26, 95%CI 0.84 to 1.90).

**Table 5** There was strong evidence that the risk of death during this pandemic period was lower for higher and further education teacher professionals compared with the working aged population of England and Wales. There was also evidence that male secondary school teachers (RR 1.26, 95%CI 1.11 to 1.43) and female primary school teachers (RR 1.18, 95%CI 1.06 to 1.32) had slightly higher mortality risk compared to the general population.

We also calculated relative risks for mortality with Covid19 and all cause mortality in educational professionals versus all professionals (Supplementary Tables S1 and S2). We found strong evidence that male and female secondary school teachers had a higher risk of mortality with Covid19 compared with all professionals. Male and female primary and secondary school teachers had higher mortality risks for all causes compared with all professionals.

**Figures 1 and 2** There are strong correlations between all cause mortality and mortality with Covid19, Pearson's correlation coefficients were 0.83,  $p = 8.2 \times 10^{-14}$  for men and 0.91,  $p = 9.6 \times 10^{-10}$  for women. All education professionals combined have both a very low Covid19 mortality and all cause mortality risk. Male secondary school teachers appear in the centre of Figure 1, whereas female primary school teachers are outliers in that they have lower Covid19 mortality relative to their all cause mortality, female secondary school teachers are slight outliers in the opposite direction with a slightly higher Covid19 mortality given their all cause mortality.

We also plotted mortality with Covid19 versus mortality from other causes on separate scatterplots (Figures S1 and S2).

### **Ratio of mortality with Covid19 to other causes**

The ratio of deaths with Covid19 to other causes of death, ranged from 1 to 3 among male nurses and midwives to 1 to 13 among elementary construction occupations (Supplementary Table 3). The ratio of Covid19 to other causes of death for male secondary school teachers was 1:7, which was similar to the average for all male professionals and all working aged men. Among women (Supplementary Table 4), the ratio of mortality with Covid19 to other causes of death, ranged from 1 to 5 among welfare professionals (social workers and probation officers) to 1 to 18 among primary and nursery schoolteachers. The ratio for female secondary school teachers was 1 to 6 for Covid19 mortality to other cause mortality,

whereas the average for both all female professionals and all working aged females was around 1 to 8.

## **Discussion**

### **Covid19 deaths among education professionals and others working in schools**

We used routinely collected data on mortality for the Office of National Statistics in the UK to study deaths with Covid19 among teachers and other school staff, during the pandemic in 2020. We found that all educational professionals combined had fewer deaths per 100,000 occurring with Covid19 compared to the general population. Similarly, when we investigated excess deaths among teachers and other staff working in schools, these were lower than among the general population for those aged 20-64. This is to be expected since the total working aged population of England and Wales will include those who are unable to work due to ill health. In addition, the number of deaths with Covid19 were greater than the excess when compared with the 5 year average for women, suggesting that some of those dying with Covid19 may have died over the course of a normal year from other causes. For those working in schools who were aged 65 and over there were large excesses in deaths compared with the last 5 years (74% for men and 37% for women), but only around a third of the excess deaths were thought to involve Covid19. It is possible that some excess deaths, particularly those occurring early on in the pandemic were due to undiagnosed Covid19 among those who did not have classic symptoms (13), but this is less likely for later deaths as the amount of testing for Covid19 increased dramatically over time in the UK. We do not have information on other causes of death within this population over this time period, however in 2019 the most common causes of death among over 65s in England and Wales were heart disease and cancer (14). It is possible that more school staff were dying from other causes during this period due to delayed treatments for other conditions or due to an unwillingness to seek help for fear of contracting SARS-Cov-2 or fear of overburdening the healthcare system.

### **Relative risk of death with Covid19 among teachers**

We found that all education professionals combined, and in particular higher education professionals, had a lower risk of dying with Covid19 compared with the total working aged population. Secondary school teachers had around a 25% higher risk (in both men and women) of dying with Covid19 compared with the general population, although there was weak evidence for the greater risk and a lot of uncertainty in the estimates. There was stronger evidence of an increased risk to secondary school teachers compared to all professionals. However, all cause mortality was also increased among secondary school teachers compared to all professionals.

Proportionate mortality ratios (mortality from a specific cause: 'all cause' or 'all other cause mortality') are routinely used in occupational epidemiology in situations where calculation and adequate standardization of mortality rate ratios is not possible (15). The rationale for doing this is that if an occupation has a particular risk for a specific disease the proportion of deaths due to that disease will be increased relative to deaths from other causes in the group. We therefore plotted the correlation between age adjusted mortality for all causes and mortality with Covid19 across minor occupational groups for whom risk was reported in the ONS dataset, the two measures are bound to be correlated to a certain extent because all cause mortality includes mortality with Covid19. However, we also found a strong positive

correlation between mortality with Covid19 and mortality from all other causes. This is consistent with findings from others which show that deaths from Covid19 closely match 'normal' risk within the UK population (13) and many predictors of Covid19 mortality are the same as those for all cause mortality (16). We found mortality from any cause amongst education professionals and teachers were towards the lower end of the distribution. For male secondary teachers their risk for mortality with Covid19 given all cause mortality was consistent with other occupational groups. Female primary school teachers were an anomaly in this respect because they simultaneously had lower relative risks for death with Covid19 and higher relative risks for all cause mortality compared to the general population. Whereas, female secondary school teachers slightly more likely to have died with Covid19 relative to other causes compared with other occupations.

### **Consistency with other studies**

The data we examined from ONS is consistent with the Public Health Scotland study and with the Swedish study neither of which showed more hospitalisations due to Covid19 among teachers compared with other occupations, but is also compatible with a slightly higher risk of Covid19 mortality among secondary school teachers. Mutambudzi and colleagues (17) also investigated the risk of hospitalisation or death by occupation after testing positive for Covid19 among 120,075 working participants (aged 49 to 64 years) in the UK Biobank study, they found weak evidence of more hospitalisations or deaths with Covid19 among education workers compared to non-essential workers up to July 2020 (OR= 1.59, 95%CI=0.87 to 2.91) after adjusting for a long list of potential confounders. However, UK Biobank is a higher selected population, which is not representative of the UK population due to a response rate of just 5% (18).

A study of data on teacher absence due to Covid19 in England during the Autumn term (September-December) 2020 found that the proportion of teachers absent due to infection appeared to be similar in both primary and secondary schools (19). The ONS infection survey found that primary and secondary school teachers had similar positivity rates for SARS-CoV2 (5.4% and 5.2% respectively) which were slightly higher than for all occupations combined (20). Despite this, primary school teachers had a lower risk of death with Covid19 compared to secondary school teachers (although confidence intervals were overlapping). In contrast a Norwegian study (8) showed little evidence of a greater risk of testing positive for Covid19 for teachers and childcare workers, but a slightly higher risk of hospitalisation for preschool teachers and childcare workers, there analyses were only adjusted for age, sex and country of birth.

Very few studies have examined risk among teaching assistants as a separate group, and we were not able to examine this group robustly in this analysis because we did not have age adjusted mortality rates for this group. A study carried out in California used modelling to compare deaths from all causes during the pandemic and found an odds ratio for teaching assistants of 1.28, but no confidence intervals for this estimate were provided (21). In agreement with this the ONS infection survey found that teaching assistants were more likely to be infected with SARS-CoV2 than other occupations (6.64% compared with 4.10% across all occupations)(20).

### **Strength and limitations of the study**

We used routinely collected data on mortality which includes all deaths in England and Wales, and results are therefore unlikely to be due to ascertainment bias and will be representative of the working aged population of these countries. However, we did not have access to individual level mortality data so were not able to account for potential

confounders such as comorbidities or household size. For our relative risk calculations our comparison group also included teachers (although they only made up a very small proportion of the total) because we did not have age adjusted mortality rates for all working aged adults and all professionals excluding teachers. The age adjusted mortality rates calculated by ONS were based on a survey conducted in 2019, if the teaching workforce has changed as a result of the pandemic these rates will be inaccurate, if any changes in the teaching workforce are systematically different to other professions the results will be biased. In addition, for many occupational groups of interest (such as teaching assistants and others working in schools) we had neither mortality rates per 100,000 nor total numbers within the group, we only had number of deaths and a 5-year average and we do not know whether the total number of staff within each occupation group changed over time. Whilst the size of the teaching workforce in England has remained fairly stable between 2015-2019, there was a marked decrease in the number of teachers retiring (from 17,853 teachers retiring in 2015 to 12,062 teachers in 2020) (22), suggesting that the average age of teachers may have increased over this time period. We do not know what impact the pandemic has had on the size and age distribution of those working in schools, it could be that older more vulnerable teachers have retired or conversely teachers may have stayed on to help with staff shortages due to teachers having to isolate. Therefore, we were unable to adequately assess the extent to which risk of death had changed during the pandemic period for these occupational groups. In addition, the number of deaths were extremely small and therefore susceptible to random fluctuations in many groups. Individuals aged 65 or over who were working in schools appeared to have much greater excess mortality than under 65s, and mortality among older school workers appeared to be greater than among the general population, but we did not have mortality rates for this group and so we were unable to fully assess their risk. In the period covered by this data many teachers worked remotely for large periods of time during 2020, and the more vulnerable staff are likely to have worked from home even when schools were fully open, which will have an impact on their workplace exposure.

## **In Conclusion**

Teachers aged 20-64 years were not at high risk of death relative to the working age population in England and Wales during the Covid19 pandemic. Female primary school teachers were outliers in that they seemed to have fewer Covid19-related deaths than expected given their all cause mortality rates. Female secondary school teachers also seemed to have slightly more deaths with Covid19 than expected, although evidence for this was weak. There were large excesses in deaths from all causes among those working in the education sector aged over 65, of which Covid19 was thought to play a role in around 35%. Further research is needed to determine the cause of these excess deaths and to identify steps to reduce this risk in future.



## References

1. Buonsenso, D.; Roland, D.; De Rose, C.; Vásquez-Hoyos, P.; Ramly, B.; Nandipa Chakakala-Chaziya, J.; Munro, A.; González-Dambrauskas, S. Schools Closures during the COVID-19 Pandemic: A Catastrophic Global Situation. *Preprints* 2020, 2020120199 (doi: 10.20944/preprints202012.0199.v1).
2. Fenton L, Gribben C, Caldwell D, Colville S, Bishop J, Reid M, White J, Hutchinson S, Robertson C, Colhoun HM, Wood R, McKeigue PM, McAllister DA. Risk of hospitalisation with COVID-19 among teachers compared to healthcare workers and other working-age adults. A nationwide case-control study. *MedRxiv* 2021.02.05.21251189 [Preprint]; doi: <https://doi.org/10.1101/2021.02.05.21251189>
3. Helsinki Graduate School of Economics. Situation Room Report: The Corona Virus and Health Differences – In Which Socioeconomic Groups Have the Most Infections Been Observed in Finland? 19<sup>th</sup> January, 2021. <https://www.helsinkigse.fi/covid19-data-en/situation-room-report-the-corona-virus-and-health-differences-in-which-socioeconomic-groups-have-the-most-infections-been-observed-in-finland/>
4. Vlachos J, Hertegård E, Svalery HB. The effects of school closures on SARS-CoV-2 among parents and teachers. *Proceedings of the National Academy of Sciences* Mar 2021, 118 (9) e2020834118; DOI: 10.1073/pnas.2020834118
5. Ismail SA, Saliba V, Lopez Bernal J, Ramsay ME, Ladhani SN. SARS-CoV-2 infection and transmission in educational settings: a prospective, cross-sectional analysis of infection clusters and outbreaks in England. *Lancet Infect Dis*. 2020 Dec 8:S1473-3099(20)30882-3. doi: 10.1016/S1473-3099(20)30882-3. Epub ahead of print.
6. Falk A, Benda A, Falk P, Steffen S, Wallace Z, Høeg TB. COVID-19 Cases and Transmission in 17 K–12 Schools — Wood County, Wisconsin, August 31–November 29, 2020. *MMWR Morb Mortal Wkly Rep* 2021;70:136–140. DOI: <http://dx.doi.org/10.15585/mmwr.mm7004e3>
7. Ludvigsson JF, Engerström L, Nordenhäll C, Larsson E. Open Schools, Covid-19, and Child and Teacher Morbidity in Sweden. *N Engl J Med*. 2021 Jan 6:NEJMc2026670. doi: 10.1056/NEJMc2026670. Epub ahead of print. <https://www.nejm.org/doi/full/10.1056/NEJMc2026670>
8. Magnusson K, Nygård K, Vold L, Telle K. Occupational risk of COVID-19 in the 1st vs 2nd wave of infection. *MedRxiv Preprints* <https://www.medrxiv.org/content/10.1101/2020.10.29.20220426v1.full.pdf>
9. Coronavirus (COVID-19) related deaths by occupation, England and Wales. Release date 25th January 2021. <https://www.ons.gov.uk/peoplepopulationandcommunity/healthandsocialcare/causesofdeath/datasets/coronaviruscovid19relateddeathsbyoccupationenglandandwales>
10. Katikireddi SV, Leyland AH, McKee M, Ralston K, Stuckler D. Patterns of mortality by occupation in the UK, 1991-2011: a comparative analysis of linked census and mortality records. *Lancet Public Health*. 2017 Oct 23;2(11):e501-e512. doi: 10.1016/S2468-2667(17)30193-7.

11. Office for National Statistics. SOC2010 volume 1: structure and descriptions of unit groups.  
<https://www.ons.gov.uk/methodology/classificationsandstandards/standardoccupationalclassificationsoc/soc2010/soc2010volume1structureanddescriptionsofunitgroups>
12. Office for National Statistics. Annual population survey (APS) QMI.  
<https://www.ons.gov.uk/employmentandlabourmarket/peopleinwork/employmentandemployeetypes/methodologies/annualpopulationsurveyapsqmi>
13. Spiegelhalter D. Use of “normal” risk to improve understanding of dangers of covid-19. *BMJ* 2020; 370: m3259. <https://doi.org/10.1136/bmj.m3259>
14. Office for National Statistics. Deaths registered in England and Wales. Release date July 2020.  
<https://www.ons.gov.uk/peoplepopulationandcommunity/birthsdeathsandmarriages/deaths/datasets/deathsregisteredinenglandandwalesseriesdrreferencetables>
15. Bhaskaran K, Bacon SCJ, Evans SJW, Bates CJ, Rentsch CT, MacKenna B, Tomlinson L, Walker AJ, Schultze A, Morton CE, Grint D, Mehrkar A, Eggo RM, Inglesby P, Douglas IJ, McDonald HI, Cockburn J, Williamson EJ, Evans D, Curtis HJ, Hulme WJ, Parry J, Hester F, Harper S, Spiegelhalter D, Smeeth L, Goldacre B. Factors associated with deaths due to COVID-19 versus other causes: population-based cohort analysis of UK primary care data and linked national death registrations within the OpenSAFELY platform. *MedRxiv Preprints*  
<https://www.medrxiv.org/content/10.1101/2021.01.15.21249756v2.full.pdf>
16. Decouflé P, Thomas TL, Pickle LW. Comparison of the proportionate mortality ratio and standardized mortality ratio risk measures. *Am J Epidemiol.* 1980 Mar;111(3):263-9. doi: 10.1093/oxfordjournals.aje.a112895.
17. Mutambudzi M, Niedwiedz C, Macdonald EB, et al. Occupation and risk of severe COVID-19: prospective cohort study of 120 075 UK Biobank participants. *Occupational and Environmental Medicine* Published Online First: 09 December 2020. doi: 10.1136/oemed-2020-106731.  
<https://oem.bmj.com/content/early/2020/12/01/oemed-2020-106731.full#DC1>
18. Tyrrell J, Zheng J, Beaumont, R. *et al.* Genetic predictors of participation in optional components of UK Biobank. *Nat Commun* **12**, 886 (2021).  
<https://doi.org/10.1038/s41467-021-21073-y>
19. Emma Southall, Alex Holmes, Edward M. Hill, Benjamin D. Atkins, Trystan Leng, Robin N. Thompson, Louise Dyson, Matt J. Keeling, Michael J. Tildesley. An analysis of school absences in England during the Covid-19 pandemic. *medRxiv* 2021.02.10.21251484 [Preprint]; doi: <https://doi.org/10.1101/2021.02.10.21251484>
20. Office for National Statistics. Coronavirus (COVID-19) Infection Survey: characteristics of people testing positive for COVID-19 in England, 22 February 2021  
<https://www.ons.gov.uk/releases/coronaviruscovid19infectionsurveycharacteristicsofpeopletestingpositiveforcovid19inengland22february2021>
21. Chen Y-H, Glymour M, Riley A, Balmes J, Duchowny K, Harrison R, Matthay E, Bibbins-Domingo K. Excess mortality associated with the COVID-19 pandemic among Californians 18–65 years of age, by occupational sector and occupation:

March through October 2020. medRxiv 2021.01.21.21250266 [Preprint]; doi:  
<https://doi.org/10.1101/2021.01.21.21250266>

22. United Kingdom Government. Reporting Year 2019. School workforce in England.  
<https://explore-education-statistics.service.gov.uk/find-statistics/school-workforce-in-england#dataBlock-4189d4c5-ba35-4f48-9248-cc39f53703a2-tables>

## Table legends

**Table 1-**Age adjusted all cause and with Covid19 mortality per 100,000 population (95% confidence intervals) taken from 3 ONS datasets on Covid19 mortality by occupation covering different time periods during the 2020 Covid19 pandemic. Includes the ratio of Covid19 deaths to all cause deaths for education professionals, all professionals and all working aged people (aged 20-64 years) stratified by sex.

**Table 2-** A breakdown the number of deaths by occupational group among those working in schools aged 20-64 years, also includes figures for all occupations and all professionals for comparison. The number of excess deaths was calculated by subtracting the 5 year average number of deaths (provided by ONS) from the number of deaths from all causes between 9<sup>th</sup> March and 28<sup>th</sup> December 2020 for each occupation and occupational group. The number of excess deaths was converted into a percentage of the 5-year average (percentage excess). The percentage excess explained by Covid19 was calculated by dividing the number of Covid19 deaths by the number of excess deaths and multiplying this by 100, we set the maximum percentage excess to be 100.

**Table 3-** A breakdown of the number of deaths by occupational group among those working in schools aged 65 years or older, also includes figures for all occupations and all professionals for comparison. The number of excess deaths was calculated by subtracting the 5 year average number of deaths (provided by ONS) from the number of deaths from all causes between 9<sup>th</sup> March and 28<sup>th</sup> December 2020 for each occupation and occupational group. The number of excess deaths was converted into a percentage of the 5-year average (percentage excess). The percentage excess explained by Covid19 by dividing the number of Covid19 deaths by the number of excess deaths and multiplying this by 100, we set the maximum percentage excess to be 100.

**Table 4-** Shows relative risks for death occurring with Covid19 for educational professionals aged 20-64 years compared to the total working aged population, calculated using age-adjusted mortality rates by occupation between 9<sup>th</sup> March and 28<sup>th</sup> December 2020 from the ONS dataset.

**Table 5-** Shows relative risks for death occurring from all causes for educational professionals aged 20-64 years compared to the total working aged population, calculated using age-adjusted mortality rates by occupation between 9<sup>th</sup> March and 28<sup>th</sup> December 2020 from the ONS dataset.

## Figure legends

**Figure 1** - Scatterplot of mortality rate (per 100,000) for Covid19 and all causes of death for men, using age adjusted mortality rates between 9<sup>th</sup> March and 28<sup>th</sup> December 2020 from ONS.

**Figure 2** - Scatterplot of mortality rate (per 100,000) for Covid19 and all causes of death for women, using age adjusted mortality rates between 9<sup>th</sup> March and 28<sup>th</sup> December 2020 from ONS



**Table 1- Age adjusted all cause and with Covid19 mortality per 100,000 population (95% confidence intervals)**

| Occupational group        | Cause of Mortality | Males                                        |                                            |                                                 | Females                                      |                                            |                                                 |
|---------------------------|--------------------|----------------------------------------------|--------------------------------------------|-------------------------------------------------|----------------------------------------------|--------------------------------------------|-------------------------------------------------|
|                           |                    | 8 <sup>th</sup> March-20 <sup>th</sup> April | 8 <sup>th</sup> March-25 <sup>th</sup> May | 8 <sup>th</sup> March-28 <sup>th</sup> December | 8 <sup>th</sup> March-20 <sup>th</sup> April | 8 <sup>th</sup> March-25 <sup>th</sup> May | 8 <sup>th</sup> March-28 <sup>th</sup> December |
| Working aged adults       | With Covid19       | 9.9<br>(9.4-10.4)                            | 19.1<br>(18.4-19.8)                        | 31.4<br>(30.6-32.3)                             | 5.2<br>(4.9-5.6)                             | 9.7<br>(9.3-10.2)                          | 16.8<br>(16.2-17.5)                             |
|                           | All cause          | 41.6<br>(40.6-42.6)                          | 78.1<br>(76.7-79.4)                        | 256.0<br>(253.5-258.4)                          | 26.3<br>(25.5-27.1)                          | 48.4<br>(47.3-49.4)                        | 158.3<br>(156.4-160.2)                          |
|                           | Ratio*             | 1:4.2                                        | 1:4.1                                      | 1:8.2                                           | 1:5.1                                        | 1:5.0                                      | 1:9.4                                           |
| Professional Occupations  | With Covid19       | 5.6<br>(4.6-6.6)                             | 11.6<br>(10.2-13.0)                        | 17.6<br>(15.9 - 19.3)                           | 4.2<br>(3.3-5.2)                             | 8.0<br>(6.8 to 9.3)                        | 12.8<br>(11.2- 14.4)                            |
|                           | All cause          | 22.2<br>(20.2-24.1)                          | 41.2<br>(38.5-43.8)                        | 130.4<br>(125.7-135.2)                          | 22.0<br>(19.9-24.1)                          | 39.3<br>(36.5-42.1)                        | 120.0<br>(115.2-124.9)                          |
|                           | Ratio*             | 1:4                                          | 1:3.6                                      | 1:7.4                                           | 1:5.2                                        | 1:4.9                                      | 1:9.4                                           |
| Educational professionals | With Covid19       | 6.7<br>(4.1-10.3)                            | 12.9<br>(9.3-17.4)                         | 18.4<br>(14.0-23.6)                             | 3.3<br>(2.0-4.9)                             | 6.0<br>(4.2-8.1)                           | 9.8<br>(7.5-12.5)                               |
|                           | All cause          | 28.0<br>(22.4-34.5)                          | 48.1<br>(40.4-55.7)                        | 153.4<br>(139.8-167.1)                          | 20.4<br>(16.9-24.0)                          | 37.2<br>(32.5-42.0)                        | 110.0<br>(101.9-118.2)                          |
|                           | Ratio*             | 1:4.2                                        | 1:3.7                                      | 1:8.3                                           | 1:6.2                                        | 1:6.2                                      | 1:11.2                                          |

\*Ratio of deaths involving Covid19 deaths to all deaths

**Table 2 Deaths among working aged (20-64) people who working in education in England and Wales 9<sup>th</sup> March to 28<sup>th</sup> December 2020**

| Description                                          | Men                       |                     |                           |           |              |                       | Women                     |                     |                           |           |           |                       |
|------------------------------------------------------|---------------------------|---------------------|---------------------------|-----------|--------------|-----------------------|---------------------------|---------------------|---------------------------|-----------|-----------|-----------------------|
|                                                      | Deaths involving COVID-19 | All causes of death | All causes 5 year average | Excess    | % excess     | Excess due to Covid19 | Deaths involving COVID-19 | All causes of death | All causes 5 year average | Excess    | % excess  | Excess due to Covid19 |
| Secondary education teaching professionals           | 29                        | 241                 | 233                       | 8         | 3%           | 100%                  | 23                        | 156                 | 173                       | -17       | -10%      | NA                    |
| Primary and nursery education teaching professionals | 4                         | 31                  | 30                        | 1         | 3%           | 100%                  | 19                        | 327                 | 368                       | -41       | -11%      | NA                    |
| Special needs education teaching professionals       | 1                         | 12                  | 8                         | 4         | 50%          | 25%                   | 3                         | 27                  | 33                        | -6        | -18%      | NA                    |
| Teaching and other educational professionals n.e.c.  | 8                         | 56                  | 32                        | 14        | 44%          | 57%                   | 7                         | 70                  | 61                        | 9         | 15%       | 78%                   |
| School secretaries                                   | 0                         | 3                   | 2                         | 1         | 50%          | 0%                    | 4                         | 58                  | 53                        | 5         | 9%        | 80%                   |
| Teaching assistants                                  | 5                         | 28                  | 19                        | 9         | 47%          | 56%                   | 37                        | 396                 | 307                       | 89        | 29%       | 42%                   |
| Educational support assistants                       | 1                         | 7                   | 8                         | -1        | -13%         | NA                    | 3                         | 55                  | 58                        | -3        | -5%       | NA                    |
| School midday and crossing patrol occupations        | 2                         | 11                  | 5                         | 6         | 120%         | 33%                   | 18                        | 169                 | 149                       | 20        | 13%       | 90%                   |
| <b>All those working in schools</b>                  | <b>50</b>                 | <b>389</b>          | <b>337</b>                | <b>52</b> | <b>15.4%</b> | <b>96%</b>            | <b>114</b>                | <b>1258</b>         | <b>1202</b>               | <b>56</b> | <b>5%</b> | <b>204%</b>           |
| All professional occupations                         | 419                       | 3144                | 2765                      | 379       | 14%          | 100%                  | 279                       | 2696                | 2477                      | 219       | 9%        | 127%                  |
| All occupations                                      | 4225                      | 33904               | 29745                     | 4159      | 14%          | 100%                  | 1742                      | 18419               | 16528                     | 1891      | 11%       | 92%                   |

**Table 3 – Deaths among over 65s who are working in education in England and Wales 9<sup>th</sup> March to 28<sup>th</sup> December 2020**

| Description                                          | Men                       |                     |                           |            |            |                       | Women                     |                     |                           |            |            |                       |
|------------------------------------------------------|---------------------------|---------------------|---------------------------|------------|------------|-----------------------|---------------------------|---------------------|---------------------------|------------|------------|-----------------------|
|                                                      | Deaths involving COVID-19 | All causes of death | All causes 5 year average | Excess     | % excess   | Excess due to Covid19 | Deaths involving COVID-19 | All causes of death | All causes 5 year average | Excess     | % excess   | Excess due to Covid19 |
| Secondary education teaching professionals           | 77                        | 565                 | 327                       | 238        | 73%        | 32%                   | 19                        | 306                 | 226                       | 80         | 35%        | 24%                   |
| Primary and nursery education teaching professionals | 10                        | 76                  | 45                        | 31         | 69%        | 32%                   | 52                        | 709                 | 495                       | 214        | 43%        | 24%                   |
| Special needs education teaching professionals       | 4                         | 30                  | 7                         | 23         | 329%       | 17%                   | 6                         | 60                  | 40                        | 20         | 50%        | 30%                   |
| Teaching and other educational professionals n.e.c.  | 9                         | 49                  | 29                        | 20         | 69%        | 45%                   | 11                        | 98                  | 60                        | 38         | 63%        | 29%                   |
| School secretaries                                   | 1                         | 3                   | 3                         | 0          | 0%         | NA                    | 13                        | 99                  | 88                        | 11         | 13%        | 118%                  |
| Teaching assistants                                  | 1                         | 14                  | 12                        | 2          | 17%        | 50%                   | 31                        | 268                 | 221                       | 47         | 21%        | 66%                   |
| Educational support assistants                       | 1                         | 6                   | 5                         | 1          | 20%        | 20%                   | 13                        | 64                  | 48                        | 16         | 33%        | 81%                   |
| School midday and crossing patrol occupations        | 4                         | 13                  | 6                         | 7          | 117%       | 57%                   | 46                        | 325                 | 231                       | 94         | 41%        | 49%                   |
| <b>All those working in schools</b>                  | <b>107</b>                | <b>756</b>          | <b>434</b>                | <b>322</b> | <b>74%</b> | <b>33%</b>            | <b>191</b>                | <b>1929</b>         | <b>1409</b>               | <b>520</b> | <b>37%</b> | <b>37%</b>            |
| All professional occupations                         | 637                       | 4504                | 3273                      | 1231       | 38%        | 52%                   | 401                       | 3480                | 2712                      | 768        | 28%        | 52%                   |
| All occupations                                      | 7033                      | 43640               | 34676                     | 8964       | 26%        | 78%                   | 2993                      | 25277               | 19842                     | 5435       | 27%        | 55%                   |



**Table 4 - Covid19 deaths for educational professionals aged 20-64 years compared to all working aged people, between 9th March and 28th December 2020**

| Description                                | Men             |                      |      |             |          | Women           |                      |      |             |           |
|--------------------------------------------|-----------------|----------------------|------|-------------|----------|-----------------|----------------------|------|-------------|-----------|
|                                            | Risk            | Risk for all workers | RR   | 95% CI      | P-value  | Risk            | Risk for all workers | RR   | 95% CI      | P-value   |
| All educational professionals              | 0.00018         | 0.00031              | 0.59 | 0.46 - 0.75 | 0.000018 | 0.000098        | 0.00017              | 0.58 | 0.46 - 0.73 | 0.0000058 |
| Higher education teaching professionals    | 0.00012         | 0.00031              | 0.37 | 0.20 - 0.68 | 0.0016   | NA <sup>1</sup> |                      |      |             |           |
| Further education teaching professionals   | 0.00025         | 0.00031              | 0.79 | 0.42 - 1.46 | 0.46     | NA <sup>1</sup> |                      |      |             |           |
| Secondary education teaching professionals | 0.00039         | 0.00031              | 1.25 | 0.87 - 1.80 | 0.23     | 0.00021         | 0.00017              | 1.26 | 0.84 - 1.90 | 0.27      |
| Primary and nursery teaching professionals | NA <sup>1</sup> |                      |      |             |          | 0.00010         | 0.00017              | 0.60 | 0.38 - 0.93 | 0.024     |

<sup>1</sup>Less than 10 deaths, rate not reported.

**Table 5 - All-cause mortality for education professionals aged 20-64 years compared to all working aged people, between 9th March and 28th December 2020**

| Description                                | Men     |                      |      |             |                        | Women   |                      |      |             |                        |
|--------------------------------------------|---------|----------------------|------|-------------|------------------------|---------|----------------------|------|-------------|------------------------|
|                                            | Risk    | Risk for all workers | RR   | 95% CI      | P-value                | Risk    | Risk for all workers | RR   | 95% CI      | P-value                |
| All educational professionals              | 0.0015  | 0.0026               | 0.60 | 0.55 - 0.65 | $1.74 \times 10^{-29}$ | 0.0011  | 0.0016               | 0.69 | 0.65 - 0.74 | $6.14 \times 10^{-23}$ |
| Higher education teaching professionals    | 0.00095 | 0.0026               | 0.37 | 0.30 - 0.47 | $2.00 \times 10^{-16}$ | 0.00073 | 0.0016               | 0.46 | 0.35 - 0.61 | $1.13 \times 10^{-07}$ |
| Further education teaching professionals   | 0.0017  | 0.0026               | 0.66 | 0.52 - 0.84 | 0.00077                | 0.00096 | 0.0016               | 0.61 | 0.47 - 0.79 | 0.00015                |
| Secondary education teaching professionals | 0.0032  | 0.0026               | 1.26 | 1.11 - 1.43 | 0.00033                | 0.0015  | 0.0016               | 0.92 | 0.78 - 1.07 | 0.28                   |
| Primary and nursery teaching professionals | 0.0024  | 0.0026               | 0.94 | 0.66 - 1.33 | 0.72                   | 0.0019  | 0.0016               | 1.18 | 1.06 - 1.32 | 0.0023                 |

**Figure 1 – Scatterplot of mortality rate (per 100,000) for Covid19 and all causes of death for men, between 9th March and 28th December 2020**

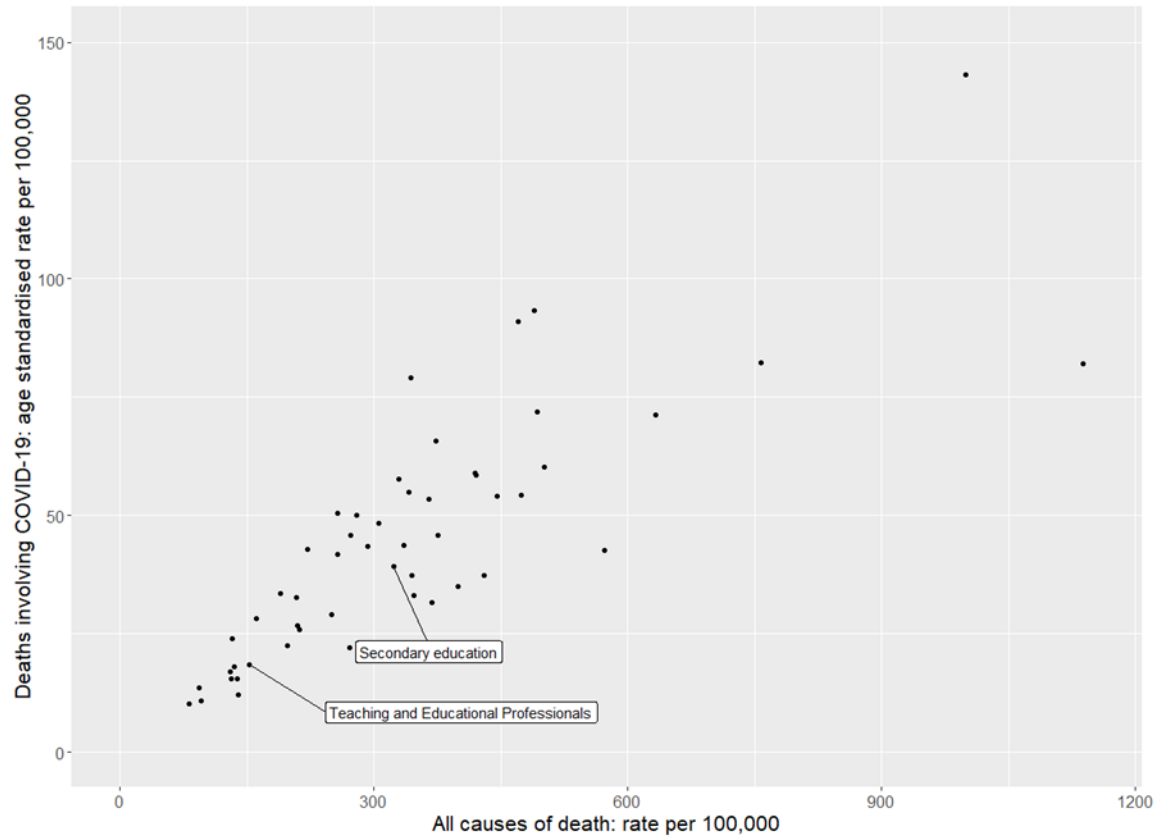

Pearson's correlation coefficient = 0.83,  $p = 8.2 \times 10^{-14}$

**Figure 2 – Scatterplot of mortality rate (per 100,000) for Covid19 and all causes of death for women, between 9th March and 28th December 2020**

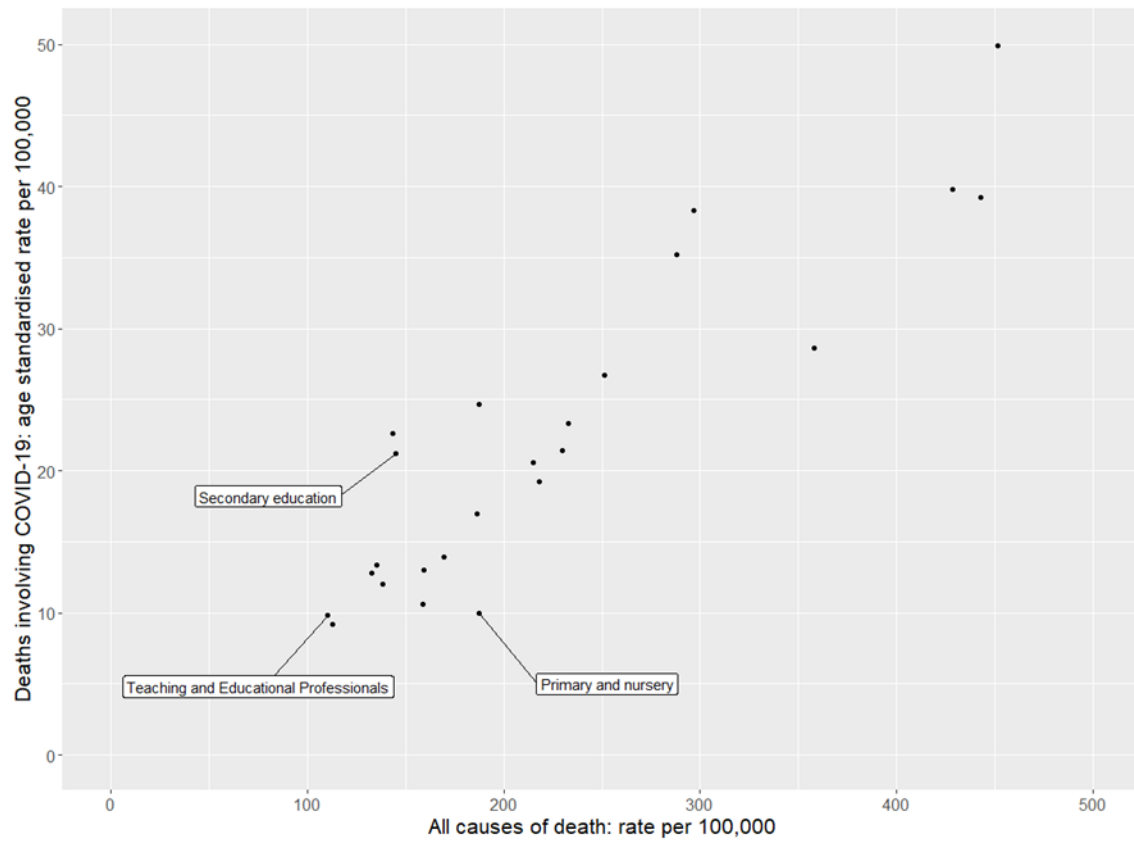

Pearson's correlation coefficient = 0.91,  $p = 9.6 \times 10^{-10}$
