# Supplementary material for: Risk of death among teachers in England and Wales during the Covid19 pandemic
Source: bioRxiv or medRxiv preprint supplement (doi:10.1101/2021.02.23.21252143), 2021-04-01
Supplement: Supplementary file [file media-1.pdf]

## Supplementary material

### Comparison of risk of death with Covid19 and from all causes for educational professionals versus all professionals

**Table 1s** shows relative risk of deaths occurring with Covid19 for educational professionals aged 20-64 years compared to all professionals, between 9th March and 28th December 2020. Risk of dying with Covid19 in males varied from 11.5 (95%CI 5.2 to 21.7) in 100,000 for professionals in higher education to 39.2 (95%CI 24.3 to 58.6) in 100,000 for secondary school teachers. Similarly, risk in females ranged from 9.8 (95%CI 7.5 to 12.5) in 100,000 for higher education professionals to 21.2 (95% CI 12.4 to 33.2) in 100,000 among secondary school teachers. Compared with all professionals there was strong evidence that the risk of dying with Covid19 was elevated for male (RR 2.23, 95%CI 1.54 to 3.22) and female (RR 1.66, 95%CI 1.09 to 2.51) secondary school teachers. There was also evidence that the risk of dying with Covid19 was reduced among female higher education professionals (RR 0.77, 95%CI 0.60 to 0.97). For other analyses the confidence intervals were wide, and it was not possible to draw firm conclusions, although there was a suggested reduction in risk for female primary school teachers and male further education teachers.

**Table 2s** shows relative risks for all cause mortality for educational professionals aged 20-64 years compared to the total working aged population, between 9th March and 28th December 2020. Both Male and Female higher education professionals had lower risks of mortality compared with the group of all professionals. However, there was very strong evidence that primary and secondary school teachers had higher risk of mortality from all causes compared with all professionals. This was especially true for males; male secondary school teachers had a 2.5 fold increased risk of mortality compared with all professionals and male primary school teachers a 1.8 fold increased risk.

### Ratio of mortality with Covid19 versus other causes

We estimated the mortality due to all causes except Covid19 (Age adjusted all cause mortality minus mortality with Covid19) and calculated the ratio of Covid19 mortality to mortality from other causes for minor occupational groups (according to ONS) and also for secondary school teachers and female primary school teachers. These figures are shown in Tables 3s and 4s.

**Table 3s** shows the age adjusted mortality rates per 100,000 individuals for deaths with Covid19, plus our estimate of the non-Covid19 mortality per 100,000 among men. The ratio of deaths with Covid19 to other causes of death, ranged from 1 to 3 among male nurses and midwives to 1 to 13 among elementary construction occupations. The ratio for male secondary school teachers was 1 death with Covid19 to 7 other deaths, which was similar to that for all education professionals.

**Table 4s** shows the age adjusted mortality rates per 100,000 individuals for deaths with Covid19, plus our estimate of the non-Covid19 mortality per 100,000 among women. The ratio of deaths with Covid19 to other causes of death, ranged from 1 to 5 among welfare professionals (social workers and probation officers) to 1 to 18 among primary and nursery

school teachers. The ratio for female secondary school teachers was 1 death with Covid19 to 6 other deaths. Therefore, Covid19 was less likely to be a factor in deaths among female primary and nursery school teachers than other professions and Covid19 was more likely to be involved in deaths among females secondary school teachers than among other professions except probation officers and social workers.

Note: There were fewer occupational groups with useable data (sufficient numbers of deaths to have age-adjusted mortality risks) for women than for men, this is due to small numbers of deaths in some groups among women.

**Figure 1s** and **2s** show scatterplots of mortality with Covid19 versus mortality from other causes for minor occupational among men (1s) and among women (2s). There was a very strong correlation between mortality with Covid19 and mortality due to other causes among both men and women, correlation coefficients were 0.78 and 0.88 among men and women respectively with very small p-values. Risk of both Covid19 mortality and mortality from all causes among teachers were lower end of the scale. Male secondary school teachers fell within the centre of the plot, suggesting that the Covid19 risk among male teachers reflects their normal mortality risk. However, both female primary and nursery school teachers and female secondary school teachers were slight outliers but in opposite directions, female primary and nursery school teachers had a low Covid19 risk relative to their all cause mortality risk and female secondary school teachers had a slightly higher Covid19 risk relative to their all cause mortality risk.

**Table S1 - Covid19 related deaths for educational professionals aged 20-64 years compared to all professionals, between 9th March and 28th December 2020**

| Description                                | Men             |                            |      |             |          | Women           |                            |      |             |         |
|--------------------------------------------|-----------------|----------------------------|------|-------------|----------|-----------------|----------------------------|------|-------------|---------|
|                                            | Risk            | Risk for all professionals | RR   | 95% CI      | P-value  | Risk            | Risk for all professionals | RR   | 95% CI      | P-value |
| All educational professionals              | 0.00018         | 0.00018                    | 1.05 | 0.82 - 1.34 | 0.74     | 0.000098        | 0.00013                    | 0.77 | 0.6 - 0.97  | 0.03    |
| Higher education teaching professionals    | 0.00012         | 0.00018                    | 0.65 | 0.35 - 1.22 | 0.18     | NA <sup>1</sup> |                            |      |             |         |
| Further education teaching professionals   | 0.00025         | 0.00018                    | 1.40 | 0.75 - 2.62 | 0.29     | NA <sup>1</sup> |                            |      |             |         |
| Secondary education teaching professionals | 0.00039         | 0.00018                    | 2.23 | 1.54 - 3.22 | 0.000025 | 0.00021         | 0.00013                    | 1.66 | 1.09 - 2.51 | 0.017   |
| Primary and nursery teaching professionals | NA <sup>1</sup> |                            |      |             |          | 0.00010         | 0.00013                    | 0.78 | 0.49 - 1.23 | 0.29    |

<sup>1</sup>Less than 10 deaths, rate not reported in ONS data.

**Table S2 – All cause mortality for education professionals aged 20-64 years compared to all professionals, between 9th March and 28th December 2020**

| Description                                | Men     |                            |      |             |                        | Women   |                            |      |             |                          |
|--------------------------------------------|---------|----------------------------|------|-------------|------------------------|---------|----------------------------|------|-------------|--------------------------|
|                                            | Risk    | Risk for all professionals | RR   | 95% CI      | P-value                | Risk    | Risk for all professionals | RR   | 95% CI      | P-value                  |
| All educational professionals              | 0.0015  | 0.0013                     | 1.18 | 1.08 - 1.28 | 0.00023                | 0.0011  | 0.0012                     | 0.92 | 0.85 - 0.98 | 0.015                    |
| Higher education teaching professionals    | 0.00095 | 0.0013                     | 0.73 | 0.58 - 0.92 | 0.007                  | 0.00073 | 0.0012                     | 0.61 | 0.46 - 0.81 | 0.00059                  |
| Further education teaching professionals   | 0.0017  | 0.0013                     | 1.29 | 1.01 - 1.65 | 0.039                  | 0.00096 | 0.0012                     | 0.80 | 0.62 - 1.04 | 0.092                    |
| Secondary education teaching professionals | 0.0032  | 0.0013                     | 2.48 | 2.18 - 2.81 | 1.41x10 <sup>-40</sup> | 0.0015  | 0.0012                     | 1.21 | 1.03 - 1.41 | 0.018                    |
| Primary and nursery teaching professionals | 0.0024  | 0.0013                     | 1.84 | 1.29 - 2.61 | 0.00077                | 0.0019  | 0.0012                     | 1.56 | 1.40 - 1.74 | 7.77 x 10 <sup>-15</sup> |

**Table S3 - Covid19 versus mortality from all other causes in men by minor occupational group**

| Group                                                            | Covid19 mortality rate | All other causes mortality rate | Ratio  |
|------------------------------------------------------------------|------------------------|---------------------------------|--------|
| Administrative Occupations: Finance                              | 45.9                   | 226.4                           | 1:4.9  |
| Administrative Occupations: Government and Related Organisations | 58.6                   | 362.2                           | 1:6.2  |
| Administrative Occupations: Records                              | 33.5                   | 155.6                           | 1:4.6  |
| Architects, Town Planners and Surveyors                          | 12.1                   | 127.8                           | 1:10.6 |
| Artistic, Literary and Media Occupations                         | 22.1                   | 248.9                           | 1:11.3 |
| Assemblers and Routine Operatives                                | 32.6                   | 175.5                           | 1:5.4  |
| Building Finishing Trades                                        | 42.6                   | 529.6                           | 1:12.4 |
| Business, Finance and Related Associate Professionals            | 15.4                   | 116.5                           | 1:7.6  |
| Business, Research and Administrative Professionals              | 13.5                   | 79.9                            | 1:5.9  |
| Caring Personal Services                                         | 91                     | 379.3                           | 1:4.2  |
| Construction and Building Trades                                 | 37.3                   | 392.5                           | 1:10.5 |
| Construction Operatives                                          | 31.6                   | 337.4                           | 1:10.7 |
| Customer Service Occupations                                     | 42.9                   | 178.3                           | 1:4.2  |
| Electrical and Electronic Trades                                 | 37.3                   | 307.5                           | 1:8.2  |
| Elementary Administration Occupations                            | 54.9                   | 286.8                           | 1:5.2  |
| Elementary Cleaning Occupations                                  | 54.3                   | 419.8                           | 1:7.7  |
| Elementary Construction Occupations                              | 82.1                   | 1055.7                          | 1:12.9 |
| Elementary Process Plant Occupations                             | 143.2                  | 856.1                           | 1:6.0  |
| Elementary Security Occupations                                  | 93.4                   | 396                             | 1:4.2  |
| Elementary Storage Occupations                                   | 54                     | 391.4                           | 1:7.2  |
| Engineering Professionals                                        | 10.8                   | 84.7                            | 1:7.8  |
| Functional Managers and Directors                                | 10.3                   | 71.3                            | 1:6.9  |
| Health Professionals                                             | 23.9                   | 108.9                           | 1:4.6  |
| Housekeeping and Related Services                                | 29.1                   | 220.4                           | 1:7.6  |
| Information Technology and Telecommunications Professionals      | 15.6                   | 122.7                           | 1:7.9  |
| Information Technology Technicians                               | 26.8                   | 183.5                           | 1:6.8  |
| Leisure and Travel Services                                      | 48.4                   | 257.7                           | 1:5.3  |
| Managers and Directors in Retail and Wholesale                   | 28.3                   | 133.3                           | 1:4.7  |
| Managers and Directors in Transport and Logistics                | 50                     | 230.3                           | 1:4.6  |
| Managers and Proprietors in Hospitality and Leisure Services     | 72                     | 421.3                           | 1:5.9  |
| Managers and Proprietors in Other Services                       | 43.5                   | 248.8                           | 1:5.7  |
| Metal Machining, Fitting and Instrument Making Trades            | 33.2                   | 313.6                           | 1:9.4  |
| Mobile Machine Drivers and Operatives                            | 35.1                   | 363.9                           | 1:10.4 |
| Nursing and Midwifery Professionals                              | 79.1                   | 264.2                           | 1:3.3  |
| Other Administrative Occupations                                 | 25.9                   | 185.8                           | 1:7.2  |
| Other Drivers and Transport Operatives                           | 43.7                   | 292.3                           | 1:6.7  |
| Other Elementary Services Occupations                            | 59                     | 360.7                           | 1:6.1  |

|                                                      |             |              |              |
|------------------------------------------------------|-------------|--------------|--------------|
| Other Skilled Trades                                 | 45.8        | 329.4        | 1:7.2        |
| Plant and Machine Operatives                         | 82.3        | 674.8        | 1:8.2        |
| Process Operatives                                   | 65.7        | 307.4        | 1:4.7        |
| Production Managers and Directors                    | 18.1        | 117.4        | 1:6.5        |
| Protective Service Occupations                       | 71.2        | 561.9        | 1:7.9        |
| Public Services and Other Associate Professionals    | 17          | 113.3        | 1:6.7        |
| Road Transport Drivers                               | 57.8        | 271.2        | 1:4.7        |
| Sales Assistants and Retail Cashiers                 | 53.5        | 312.1        | 1:5.8        |
| Sales Related Occupations                            | 41.7        | 215.3        | 1:5.2        |
| Sales, Marketing and Related Associate Professionals | 22.5        | 175.5        | 1:7.8        |
| <b>Secondary education</b>                           | <b>39.2</b> | <b>283.8</b> | <b>1:7.2</b> |
| Teaching and Educational Professionals               | 18.4        | 135          | 1:7.3        |
| Vehicle Trades                                       | 60.2        | 441.3        | 1:7.3        |
| Welfare Professionals                                | 50.5        | 206.5        | 1:4.1        |

Mortality rates are per 100,000 individuals

**Table S4 - Covid19 versus mortality from all other causes in women by minor occupational group**

| Group                                                            | Covid19 mortality rate | All other causes mortality rate | Ratio         |
|------------------------------------------------------------------|------------------------|---------------------------------|---------------|
| Administrative Occupations: Finance                              | 13                     | 146.2                           | 1:11.2        |
| Administrative Occupations: Government and Related Organisations | 19.2                   | 198.8                           | 1:10.4        |
| Assemblers and Routine Operatives                                | 39.2                   | 403.8                           | 1:10.3        |
| Caring Personal Services                                         | 38.3                   | 258.5                           | 1:6.7         |
| Childcare and Related Personal Services                          | 12.8                   | 120                             | 1:9.4         |
| Customer Service Occupations                                     | 13.4                   | 121.6                           | 1:9.1         |
| Elementary Cleaning Occupations                                  | 20.6                   | 194.5                           | 1:9.4         |
| Elementary Process Plant Occupations                             | 49.9                   | 401.6                           | 1:8.0         |
| Elementary Security Occupations                                  | 17                     | 169.2                           | 1:10.0        |
| Food Preparation and Hospitality Trades                          | 28.6                   | 329.2                           | 1:11.5        |
| Hairdressers and Related Services                                | 39.8                   | 388.8                           | 1:9.8         |
| Managers and Directors in Retail and Wholesale                   | 26.7                   | 224.3                           | 1:8.4         |
| Managers and Proprietors in Hospitality and Leisure Services     | 35.2                   | 252.8                           | 1:7.2         |
| Managers and Proprietors in Other Services                       | 13.9                   | 155.4                           | 1:11.2        |
| Nursing and Midwifery Professionals                              | 24.7                   | 162.7                           | 1:6.6         |
| Other Administrative Occupations                                 | 12                     | 126.5                           | 1:10.5        |
| Other Elementary Services Occupations                            | 21.4                   | 208.5                           | 1:9.7         |
| <b>Primary and nursery</b>                                       | <b>10</b>              | <b>177.5</b>                    | <b>1:17.8</b> |
| Sales Assistants and Retail Cashiers                             | 23.3                   | 209.6                           | 1:9.0         |
| <b>Secondary education</b>                                       | <b>21.2</b>            | <b>123.8</b>                    | <b>1:5.8</b>  |
| Secretarial and Related Occupations                              | 10.6                   | 148.1                           | 1:14.0        |
| Teaching and Educational Professionals                           | 9.8                    | 100.2                           | 1:10.2        |
| Welfare and Housing Associate Professionals                      | 9.2                    | 103.3                           | 1:11.2        |
| Welfare Professionals                                            | 22.6                   | 120.9                           | 1:5.3         |

Mortality rates are per 100,000 individuals

**Figure S1 – Scatterplot of mortality rate (per 100,000) for Covid19 and all other causes of death for men, between 9th March and 28th December 2020**

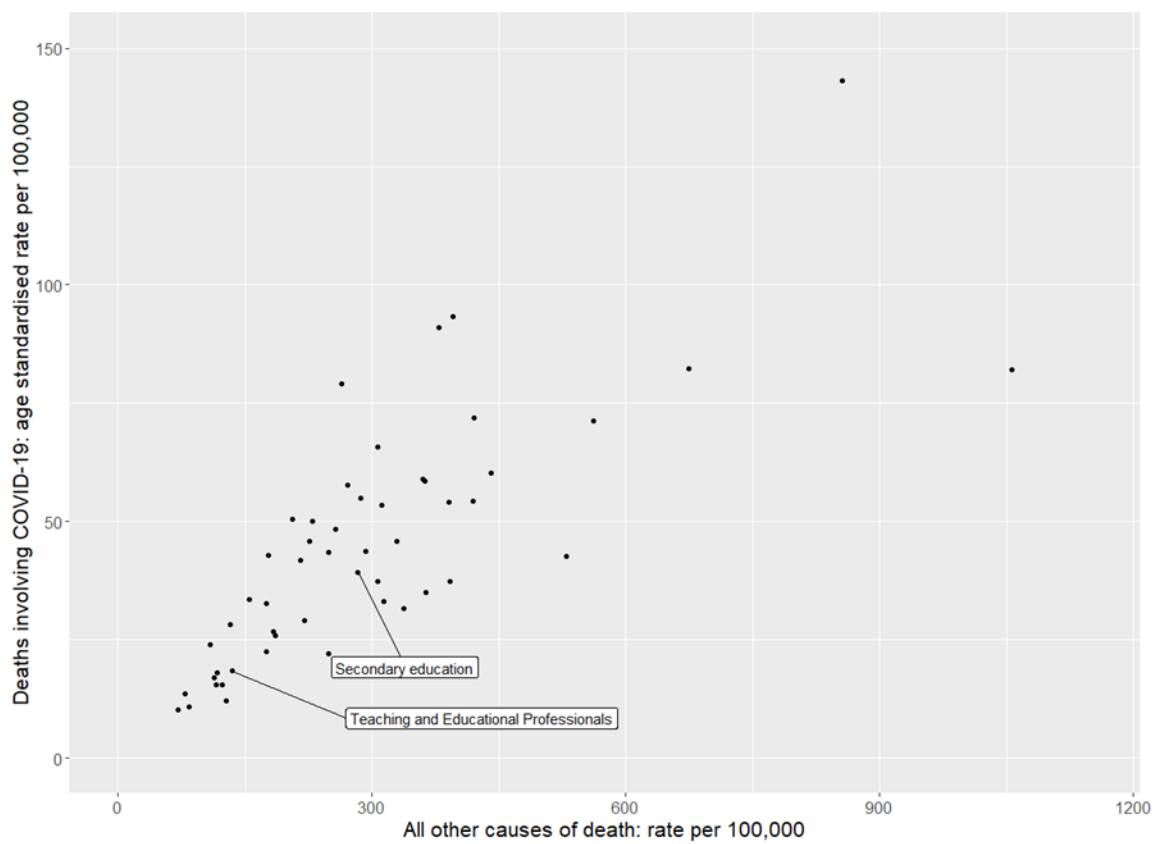

Pearson's correlation coefficient = 0.78,  $p = 1.4 \times 10^{-11}$

**Figure S2 – Scatterplot of mortality rate (per 100,000) for Covid19 and all other causes of death for women, between 9th March and 28th December 2020**

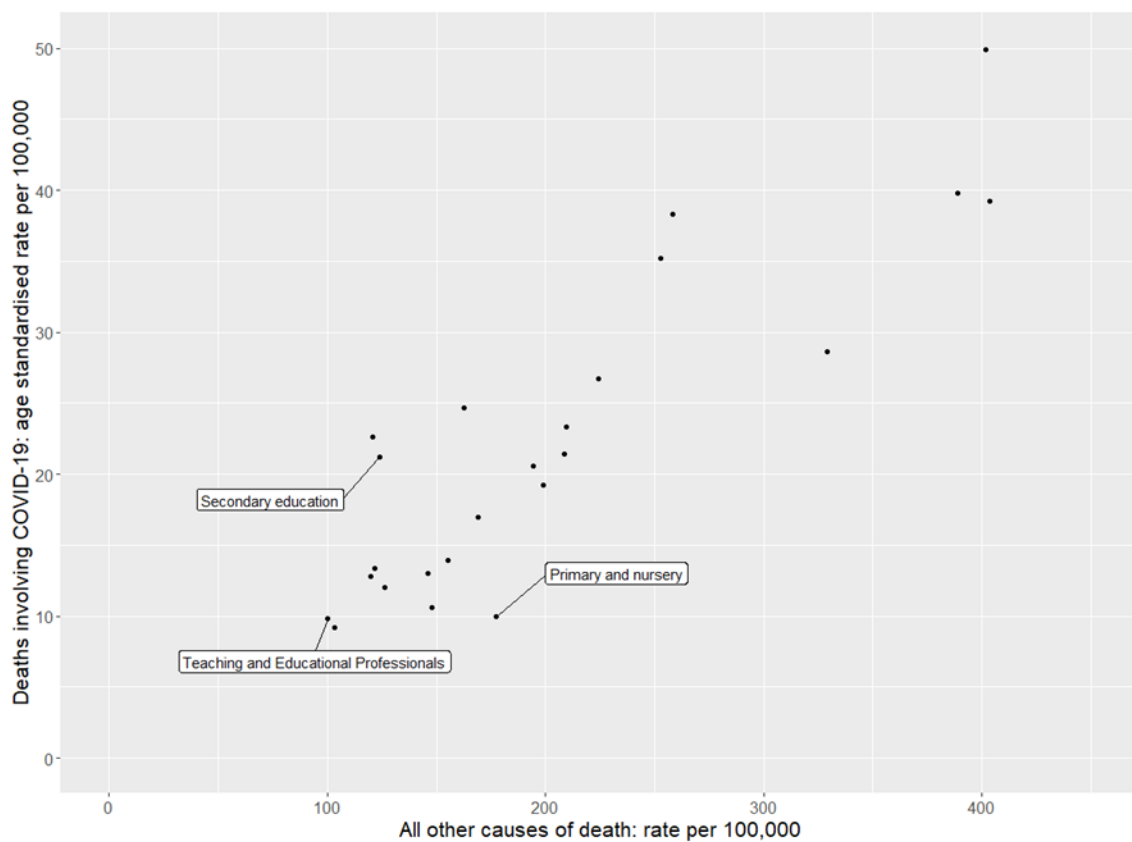

Pearson's correlation coefficient = 0.88,  $p = 9.5 \times 10^{-09}$
